# Supplementary material
Source: PubMed Central journal article supplement (PMC8160500)

## Supplemental Data and Materials

**Table S1: X-ray data collection and refinement statistics**

|                                              |                                                                           |
|----------------------------------------------|---------------------------------------------------------------------------|
| <b>Wavelength (Å)</b>                        | 1                                                                         |
| <b>Resolution range (Å)</b>                  | 49.4 - 3.92 (4.06 - 3.92)                                                 |
| <b>Space group</b>                           | P 4 <sub>1</sub> 2 <sub>1</sub> 2                                         |
| <b>Unit cell</b>                             | a = 116.721, b = 116.721, c = 371.057; $\alpha$ , $\beta$ , $\gamma$ = 90 |
| <b>Total reflections</b>                     | 46,740 (4,579)                                                            |
| <b>Unique reflections</b>                    | 23,566 (2,317)                                                            |
| <b>Multiplicity</b>                          | 2.0 (2.0)                                                                 |
| <b>Completeness (%)</b>                      | 97.61 (94.06)                                                             |
| <b>Mean I/sigma(I)</b>                       | 5.74 (0.82)                                                               |
| <b>Wilson B-factor</b>                       | 147.58                                                                    |
| <b>R<sub>merge</sub></b>                     | 0.09953 (0.9323)                                                          |
| <b>R<sub>meas</sub></b>                      | 0.1408 (1.319)                                                            |
| <b>R<sub>pim</sub></b>                       | 0.09953 (0.9323)                                                          |
| <b>CC1/2</b>                                 | 0.994 (0.342)                                                             |
| <b>CC*</b>                                   | 0.999 (0.714)                                                             |
| <b>Reflections used in refinement</b>        | 23,430 (2201)                                                             |
| <b>Reflections used for R<sub>free</sub></b> | 1,991 (188)                                                               |
| <b>R<sub>work</sub></b>                      | 0.2257 (0.3685)                                                           |
| <b>R<sub>free</sub></b>                      | 0.3220 (0.4313)                                                           |
| <b>Number of non-hydrogen atoms</b>          | 13,605                                                                    |
| macromolecules                               | 13,498                                                                    |
| ligands                                      | 106                                                                       |
| solvent                                      | 1                                                                         |
| <b>Protein residues</b>                      | 1,694                                                                     |
| <b>RMS (bonds)</b>                           | 0.004                                                                     |
| <b>RMS (angles)</b>                          | 0.78                                                                      |
| <b>Ramachandran favored (%)</b>              | 74.76                                                                     |
| <b>Ramachandran allowed (%)</b>              | 19.78                                                                     |
| <b>Ramachandran outliers (%)</b>             | 5.46                                                                      |
| <b>Rotamer outliers (%)</b>                  | 0.13                                                                      |
| <b>Clashscore</b>                            | 17.61                                                                     |
| <b>Average B-factor</b>                      | 148.55                                                                    |
| macromolecules                               | 148.29                                                                    |
| ligands                                      | 182.18                                                                    |
| solvent                                      | 108.76                                                                    |

**Table S2. Interfacial contacts between ET3i C1 domain and 2A9 light chain.**

| C1 Domain | Light Chain        |
|-----------|--------------------|
| P2067     | P55                |
| F2068     | L45, Y33, F48, F49 |
| Q2100     | Y31                |
| I2102     | Y31, F49           |
| T2122     | N30                |
| V2125     | Y31                |
| T2154     | Y31                |
| H2155     | S51, F49           |
| Y2156     | L53                |

**Table S3. Interfacial contacts between ET3i C1 domain and 2A9 heavy chain.**

| C1 Domain | Heavy Chain |
|-----------|-------------|
| S2040     | Y32         |
| E2066     | Y109        |
| W2070     | Y102        |
| I2102     | V103        |
| M2104     | Y102, V103  |
| K2110     | E54         |
| W2112     | Y102        |
| R2150     | D31         |

**Table S4. Interfacial contacts between ET3i A3 domain and 2A9 light chain.**

| A3 Domain | Light Chain |
|-----------|-------------|
| D1740     | S28         |
| S1742     | T26         |
| T1744     | N2, S92     |
| Q1745     | T91         |
| Y1748     | T91         |
| N1810-NAG | K65         |

**Data sharing:** Public deposit in the Protein Databank (PDBID: 7K66)

**Figure S1. Binding sites on the C1 domain.** Crystal structure of the C1 domain reported in this study (grey) with highlighted regions showing multiple binding sites that were previously reported using hydrogen/deuterium exchange. The 2A9 epitope (red) and vWF binding site (yellow) share a similar binding loop (2062-2069) that is distinct from the lipid binding region (cyan).

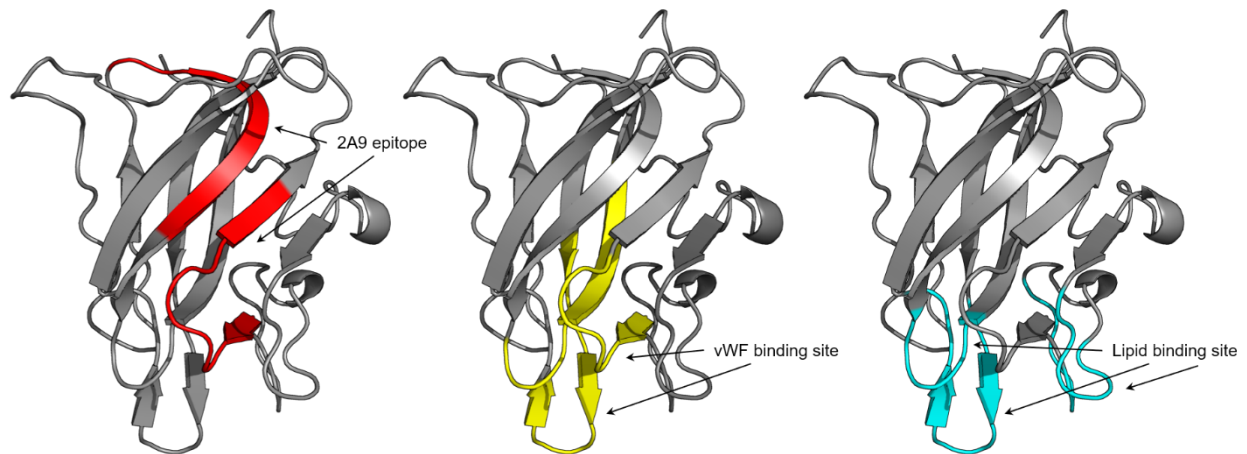

**Figure S2. Conformational changes of the fVIII C2 domain.** (A) Structural superposition of fVIII reported in this study (yellow, pdb#: 7K66) with the previously reported crystal structure of fVIII in the canonical conformation (pink, pdb#: 6MF0 model A). Structural superposition of each fVIII structure highlights the conserved domain architecture of the A1-A3 and C1 domains. (B) Structural superposition of models A (pink) and B (cyan) from the recently published 3.2 Å structure of ET3i (pdb#: 6MF0). By contrast to the C2 domain translocation in (A), the conformational change of the C2 domain illustrates a barrel-like rotation about an axis central to the C2 domain structure.

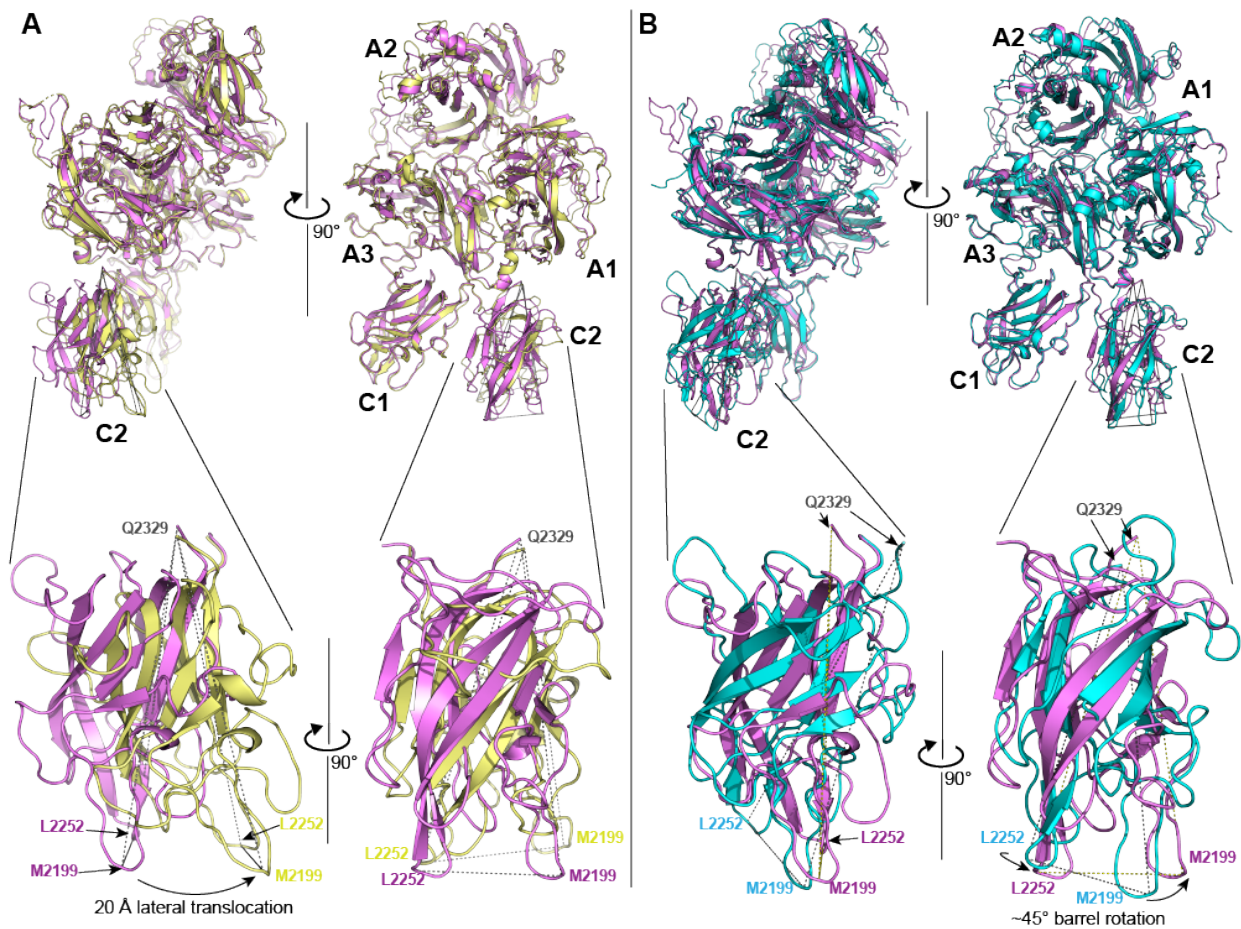

**Figure S3. Interdomain contacts between the C2 Domain and the A1/C1 Domains.** (A,B) Interdomain contacts within 5 Å between the C2 and A1 domains. (A) The A1/C2 domain interface in the ET3i/2A9 complex structure in this study (teal: A1, blue: C2; pdb#: 7K66). (B) the A1/C2 domain interface in the previously determined ET3i structure (light gray: A1, dark gray: C2; Smith, *et al.* (2020), pdb#: 6MF0). (C,D) Interdomain contacts within 5 Å between the C2 and C1 domains. (A) The C1/C2 domain interface in the ET3i/2A9 complex structure in this study (yellow: C1, blue: C2; pdb#: 7K66). (B) the C1/C2 domain interface in the previously determined ET3i structure (light gray: A1, dark gray: C2, Smith, *et al.* (2020), pdb#: 6MF0).

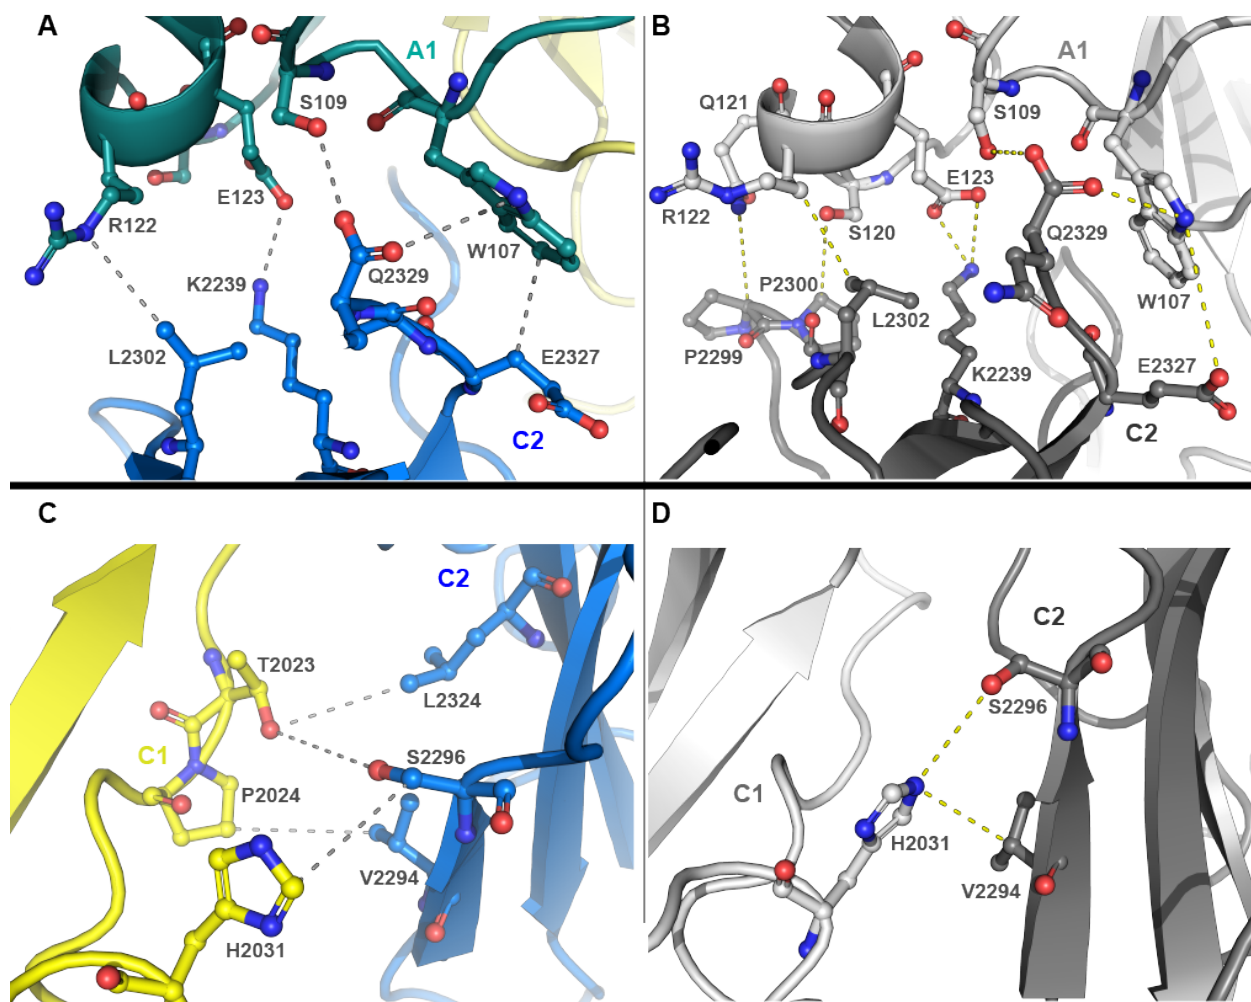

Supplement: bloodBLD2020008940-suppl1.pdf [file bloodBLD2020008940-suppl1.pdf]
